# Supplementary material
Source: PubMed Central journal article supplement (PMC3964358)
Supplement: 10-1055-s-0033-1360163-sup_gf722.pdf [file 10-1055-s-0033-1360163-sup_gf722.pdf]

# Das Polyhydramnion: Ursachen, Diagnostik und Therapie

## Polyhydramnios: Causes, Diagnosis and Therapy

### Autoren

A. Hamza<sup>1</sup>, D. Herr<sup>1</sup>, E. F. Solomayer<sup>2</sup>, G. Meyberg-Solomayer<sup>1</sup>

### Institute

<sup>1</sup> Gynäkologie und Geburtshilfe, Universitätsklinikum des Saarlandes, Homburg

<sup>2</sup> Klinik für Frauenheilkunde, Geburtshilfe und Reproduktionsmedizin, Universitätsklinikum des Saarlandes, Homburg/Saar

### Schlüsselwörter

- Polyhydramnion
- Fruchtwasser
- Risikoschwangerschaft

### Key words

- polyhydramnios
- amniotic fluid
- high risk pregnancy

### Zusammenfassung

Als Polyhydramnion bezeichnet man eine pathologische Vermehrung von Fruchtwasser bei der Schwangeren, die mit einer erhöhten perinatalen Morbidität und Mortalität vergesellschaftet ist. Häufige Ursachen eines Polyhydramnions sind der Gestationsdiabetes, fetale Fehlbildungen, die z.B. zu einem gestörten Schluckvorgang von Fruchtwasser führen, fetale Infektionen und andere seltene Ursachen. Die Diagnostik des Polyhydramnions erfolgt dabei v.a. sonografisch. Die Prognose des Polyhydramnions hängt von der Ursache sowie der klinischen Ausprägung ab: Typische Folgen des Polyhydramnions beinhalten maternale Atembeschwerden, die Frühgeburtlichkeit, den vorzeitigen Blasensprung, regelwidrige Kindslagen, den Nabelschnurvorfall, sowie die postpartale Blutung. Aufgrund einer gemeinsamen Ätiologie mit einem Gestationsdiabetes ist das Polyhydramnion darüber hinaus mit einer fetalen Makrosomie assoziiert. Zur Vermeidung der o.g. Komplikationen bestehen pränatal grundsätzlich 2 Therapieformen: die invasive Entlastungspunktion und die medikamentöse Amnionreduktion mit z.B. Non-Steroidal Anti-inflammatorische drugs (NSAID), die jedoch in Deutschland bei dieser Indikation nicht zugelassen sind. Darüber hinaus gibt es in jüngster Zeit experimentelle Therapieansätze, die auf die Beeinflussung der fetalen Diurese zielen.

### Einleitung

Ein Polyhydramnion bezeichnet eine übermäßige Akkumulation von Fruchtwasser. Diese klinische Situation ist mit einem erhöhten Risiko für ein schlechtes Outcome der Schwangerschaft assoziiert [1–3]. Die Inzidenz des Polyhydramnions schwankt dabei zwischen von 0,2 bis 1,6% aller Schwangerschaften [4–7].

### Abstract

Polyhydramnios is defined as a pathological increase of amniotic fluid volume in pregnancy and is associated with increased perinatal morbidity and mortality. Common causes of polyhydramnios include gestational diabetes, fetal anomalies with disturbed fetal swallowing of amniotic fluid, fetal infections and other, rarer causes. The diagnosis is obtained by ultrasound. The prognosis of polyhydramnios depends on its cause and severity. Typical symptoms of polyhydramnios include maternal dyspnea, preterm labor, premature rupture of membranes (PPROM), abnormal fetal presentation, cord prolapse and postpartum hemorrhage. Due to its common etiology with gestational diabetes, polyhydramnios is often associated with fetal macrosomia. To prevent the above complications, there are two methods of prenatal treatment: amnioreduction and pharmacological treatment with non-steroidal anti-inflammatory drugs (NSAIDs). However, prenatal administration of NSAIDs to reduce amniotic fluid volumes has not been approved in Germany. In addition to conventional management, experimental therapies which would alter fetal diuresis are being considered.

Unter physiologischen Bedingungen besteht ein dynamisches Gleichgewicht zwischen Produktion und Resorption des Fruchtwassers. Dieses wird durch fetale Miktion und Lungenflüssigkeitsproduktion gebildet. Durch fetales Schlucken und intramembranöse und intravaskuläre Aufnahme wird das Fruchtwasser resorbiert. Der relative Anteil von jedem der genannten Mechanismen variiert im Verlauf der Schwangerschaft. Folge

eingereicht 21. 10. 2013  
revidiert 12. 11. 2013  
akzeptiert 12. 11. 2013

### Bibliografie

**DOI** <http://dx.doi.org/10.1055/s-0033-1360163>  
Geburtsh Frauenheilk 2013; 73:  
1–6 © Georg Thieme Verlag KG  
Stuttgart · New York ·  
ISSN 0016-5751

### Korrespondenzadresse

**Mr. Amr Hamza, Postgraduate**  
Universitätsklinikum  
des Saarlandes  
Gynäkologie und Geburtshilfe  
Kirrberger Straße 100  
66424 Homburg  
Dramrh@gmail.com

eines gestörten Verhältnisses kann eine beeinträchtigte Schluckfunktion oder vermehrte Miktion sein, was zu einem Polyhydramnion führen kann [8–11].

Der Fetus produziert terminnah zwischen 500–1200 ml Urin und schluckt zwischen 210–760 ml Fruchtwasser pro Tag. Kleine Veränderungen dieses Gleichgewichts können signifikante Veränderungen des Fruchtwasservolumens bewirken [9–11].

## Ätiologie

Bei einem milden Polyhydramnion wird nur in 17% der Fälle eine Grunderkrankung ermittelt. Bei mäßig bis schwerem Polyhydramnion ist dies dagegen in 91% der Fälle möglich [5]. Die Ätiologie wird in der Literatur folgendermaßen unterteilt [5, 7, 12–19]:

- ▶ fetale Fehlbildungen und genetische Störungen (8–45%)
- ▶ maternaler Diabetes mellitus (5–26%)
- ▶ Mehrlingsschwangerschaften (8–10%)
- ▶ fetale Anämie (1–11%)
- ▶ Andere Gründe, z.B. virale Infektionen, Bartter-Syndrom, neuromuskuläre Erkrankungen, maternale Hyperkalzämie. Virale Infektionen, die zu einem Polyhydramnion führen können, sind z.B. Parvovirus-B19-Infektion, Rötelninfektion, Zytomegalievirus. Andere Infektionen, z.B. Toxoplasmose und Syphilis, können auch ein Polyhydramnion verursachen [80–82].

Die Fortschritte in der sonografischen Feindiagnostik und die Prävention von Rhesus-Isoimmunisation in den letzten Jahrzehnten hat die relative Frequenz dieser Ätiologien verändert, sodass die Anzahl der idiopathischen Fälle deutlich gesunken ist [12–19].

Bekannte strukturelle Defekte, die den Schluckreflex behindern, sind die Ösophagusatresie, duodenale Atresien [16, 17] und neuromuskuläre Erkrankungen wie z.B. die myotone Dystrophie. Eine vermehrte Urinproduktion, wie bei erhöhter kardialer Leistung, z.B. im Rahmen einer fetalen Anämie, kann ebenfalls eine vermehrte Fruchtwasserproduktion verursachen [20, 21]. Diese Veränderungen können auch im Rahmen von chromosomalen Störungen wie z.B. einer Trisomie 21, oder bei verschiedensten Syndromen auftreten. Bei der Trisomie 21 spielt die Duodenalatresie ätiologisch die Hauptrolle [79].

Ein schlecht eingestellter Gestationsdiabetes ist mit fetaler Makrosomie und einem Polyhydramnion assoziiert, jedoch ist die Pathogenese noch nicht endgültig geklärt [22]. Eine mögliche Erklärung ist eine fetale Hyperglykämie, die zu einer osmotischen Diurese und daraus folgend zu einer Polyurie führen kann. Eine hohe Assoziation von hohen glykosylierten Hämoglobinwerten (HBA<sub>1c</sub>) bei Polyhydramnion untermauert diese Theorie [22, 23]. Laut der AWMF-S3-Leitlinie kann das Polyhydramnion ein Hinweis für eine diabetogene Fetopathie sein. Jedoch spielt das Polyhydramnion aufgrund der Variationsbreite der Fruchtwassermenge keine wesentliche Rolle bei der Überwachung des Gestationsdiabetes [68]. Bei maternalem Diabetes mellitus liegt die Inzidenz eines Polyhydramnions dabei bei 18,8% [23]. Da auch ein fetales metabolisches Syndrom die Ursache sein könnte, sollten Neugeborene von Schwangeren mit einem Polyhydramnion vom Pädiater über einen gewissen Zeitraum kontrolliert werden [24, 25].

## Sonografische Beurteilung des Fruchtwasservolumens

Die Diagnostik des Fruchtwassers beruht auf einer sonografischen Evaluation. Hierbei werden subjektive und semiquantitative Methoden beschrieben: Bei der subjektiven Methode beurteilt der Untersucher das Fruchtwasservolumen anhand des persönlichen Eindrucks der Fruchtwasserdepots. Hierbei spielt die Erfahrung des Untersuchers eine große Rolle [26]. Im Falle eines Oligo- oder Polyhydramnions sind bei unerfahrenen Untersuchern biometrische Messungen mit Referenzen genauer, während in der Hand des Erfahrenen auch die alleinige subjektive Einschätzung mit guten Ergebnissen assoziiert ist [27].

Daher wurden auch verschiedene semiquantitative Methoden zur Messung der Fruchtwassermenge beschrieben. Allerdings haben auch diese Methoden ihre Grenzen, die berücksichtigt werden sollten [28]:

### Tiefstes Depot (Single-Pocket-Messung)

Hierbei wird der Uterus in 4 Quadranten unterteilt. Die Fruchtwassermenge wird im tiefsten Fruchtwasserdepot vertikal ausgemessen. Werte unter 2 cm zeigen ein Oligohydramnion an, Werte über 8 cm zeigen ein Polyhydramnion an [30]. Vorteil dieser Methode beruht auf ihrer Einfachheit; sie ist dementsprechend die am häufigsten benutzte Methode. Sie ist auch die Methode der Wahl im Falle einer Mehrlingsschwangerschaft. In diesen Fällen wird ein Bereich zwischen 3–8 cm als normal definiert. Mit dieser Methode kann das Polyhydramnion in mild, mäßig und ausgeprägt eingeteilt werden. Ein mildes Polyhydramnion ist mit einem Depot von 8–11 cm, ein mäßiges von 12–15 cm und ein ausgeprägtes über 16 cm gekennzeichnet [86].

### Vier-Quadranten-Methode (AFI – Amniotic Fluid Index)

Hierbei wird jeweils das tiefste Fruchtwasserdepot in jedem der 4 Quadranten vertikal gemessen und addiert. Der Uterus wird hierbei durch die Linea nigra in 2 Hälften geteilt. Eine imaginäre Linie quer durch den Nabel teilt den Uterus in eine obere und untere Hälfte. Bei der Messung muss der Schallkopf senkrecht zur Untersuchungsebene und sagittal zur Patientin liegen. Der Schallkopf darf entlang des maternalen Abdomens nicht gekippt werden, d.h. er bleibt in der o.g. Position. Die gemessenen Fruchtwasserdepots dürfen keine fetalen Anteile und keine Nabelschnur enthalten und müssen mindestens 0,5 cm breit sein. Die Summe aller 4 Quadranten wird Amniotic Fluid Index (AFI) genannt. Nach der o.g. Untersuchungsgruppe gilt als normaler AFI ein Wert zwischen 8,1 und 18 cm, als Oligohydramnion zwischen 5,1 und 8,0 cm, als ausgeprägtes Oligohydramnion ein AFI von weniger als 5,0 cm und als Polyhydramnion ein Wert über 18 cm [31].

Einige Pränataldiagnostiker unterscheiden 3 Schweregrade des Polyhydramnions mithilfe des AFI: leichtes Polyhydramnion bei einem AFI von 25–30 cm, mäßiges Polyhydramnion 30,1–35 cm und ausgeprägtes Polyhydramnion  $\geq 35,1$  cm [87].

Die Arbeitsgruppe von Moore und Cayle [32] untersuchte die Verteilung der AFI-Messungen in einer Population von unauffälligen Schwangerschaften. Im Gegensatz zur Definition eines Oligohydramnions in der Arbeitsgruppe von Phelan et al. fanden sie, dass ein AFI von 5 cm nur bei 1% der normalen Schwangerschaften beobachtet wurde. Die Intraobserver-Varianz schwankte dabei zwischen 0,5 und 1 cm, während die Interobserver-Varianz zwischen 1 und 2 cm lag. Um eine optimale Genauigkeit zu erreichen, empfiehlt es sich, einen Durchschnitt von 3 Messungen zu

errechnen, insbesondere, wenn der AFI unter 10 cm beträgt [32]. Der Einsatz der farbkodierten Doppler-Sonografie bringt den Vorteil, die Nabelschnurschlingen besser zu erkennen. Jedoch wird laut einer retrospektiven Studie von Zlatnik et al. [34] ein Oligohydramnion überschätzt und ein Polyhydramnion unterschätzt, wenn man die Standard-AFI-Kurven benutzt [33, 34]. Man sollte beachten, dass der Druck des Schallkopfs auch Veränderungen des AFI oder bei der Messung des tiefsten Depots erzeugen kann. Mit minimalem Druck steigt der AFI um 13%, während bei hohem Druck eine Unterschätzung um 21% erzeugt wird [35–38].

### Die Fruchtwasserquantifikation in den deutschen Mutterschaftsrichtlinien

In den deutschen Mutterschaftsrichtlinien gehört die Fruchtwasserbeurteilung zur basalen Untersuchung in der Schwangerschaftsvorsorge. Hierbei wird ein Oligo- oder Polyhydramnion als Hinweiszeichen einer Entwicklungsstörung betrachtet. Bei einer Entwicklungsstörung wird eine Verlaufskontrolle und weiterführende Diagnostik empfohlen [69]. Die Diagnose des Polyhydramnions scheint unabhängig von der Schwangerschaftswoche zu sein. Schon bei der ersten sonografischen Darstellung des Amnions in der 7. SSW kann ein vermehrtes Amnionvolumen mit einem schlechten embryonalen Outcome assoziiert sein [70, 71]. Jedoch gibt es unterschiedliche Konstellationen, welche die Prognose bestimmen. Die Kombination z. B. von Small-for-gestational-Age-(SGA-)Feten und Polyhydramnion hat eine besonders ungünstige Prognose, da sie mit einer hohen Frequenz von Fehlbildungen assoziiert ist. Typischerweise ist die Trisomie 18 eine Verdachtsdiagnose [72, 73]. Andererseits kann im Falle einer monochorionalen diamnialen Gravidität bei Vorliegen eines Polyhydramnions bei einem Feten und Oligohydramnion des anderen ein fetofetales Transfusionsyndrom die Ursache sein [74–77].

### Vergleich zwischen den beiden Methoden (AFI und SDP)

Ziel der Fruchtwasservolumenquantifizierung ist eher die Detektion von Fruchtwasserpathologien, die mit einem schlechten Outcome assoziiert sind, als die tatsächliche Bestimmung des Fruchtwasservolumens [29]. In einem systematischen Review von randomisierten Studien konnte kein Vorteil irgendeiner Methode festgestellt werden [39, 40, 41, 89]. Bei der AFI-Methode wurden signifikant mehr Fälle eines Oligohydramnions beobachtet. Ebenfalls gibt es keinen signifikanten Unterschied beider Verfahren bez. der Voraussage des perinatalen Outcomes bei übertragene Schwangerschaften. Die Messung des tiefsten Depots (SDP) ist aber die Methode der Wahl bei Mehrlingsschwangerschaft aufgrund ihrer Einfachheit bei gleicher Effizienz [90–98].

### Weiterführende Diagnostik beim Vorliegen eines Polyhydramnions

#### ▼ Sonografische Untersuchung

Im Rahmen des Organscreenings sollte eine sorgfältige Untersuchung des Feten durchgeführt werden. Die am häufigsten übersehenen Anomalien sind tracheoösophageale Fisteln, Herzseptumdefekte und Gaumenspalten [7]. Bei einer fetalen Fehlbildung oder mehreren Soft-Markern wird eine Abklärung des Karyotyps nach Einwilligung der Eltern und Aufklärung im Rahmen des Gendiagnostikgesetzes empfohlen [42–45]. In einer großen Studie zeigte sich eine Prävalenz von Aneuploidien bei fetalen Fehlbildungen von 10% (95%-KI 5–19%) [7]. Kontrovers wird dis-

kutiert, dass im Falle eines ausgeprägten Polyhydramnions das Risiko einer Fehlbildung auf 11% steigt. Dagegen ist das Risiko einer fetalen Fehlbildung bei mildem Polyhydramnion 1% und bei moderaten Polyhydramnion 2% [99].

In Deutschland ist es empfohlen, eine Feindiagnostik bei hohem Verdacht auf Fehlbildungen in einem Pränatalzentrum mit ausreichender Erfahrung (DEGUM II/III) durchführen zu lassen.

Manche Ursachen, z. B. Schluckstörungen und tracheoösophageale Fisteln oder Atresien, werden häufig pränatal mit Ultraschall übersehen. Hierbei könnte das fetale MRT einen Vorteil bei der Diagnostik einer tracheoösophagealen Fistel oder Atresie haben [82–85].

### Laborchemische Untersuchungen

Zur weiterführenden Abklärung eines Polyhydramnions durchgeführte Laboruntersuchungen sollten folgende Parameter beinhalten:

- ▶ 75 g-OGTT zum Ausschluss eines Gestationsdiabetes
- ▶ maternale Infektionsdiagnostik (TORCH-Serologie)
- ▶ Bei V. a. fetale Anämie oder Hydrops fetalis Ausschluss immunologischer Ursachen (mütterliche Blutgruppe, Rhesusfaktor, Antikörper-Suchtest), hämatologische Erkrankungen, evtl. Kleihauer-Bethke-Test zum Ausschluss fetomaternaler Blutungen). In der Literatur sind auch Medikamente beschrieben, z. B. Lithium, die mit einem Polyhydramnion assoziiert sind. Lithium ist ein psychotropes Medikament, das pränatal bei z. B. bipolaren Störungen eingesetzt wird [100].

Eine ausgeprägte fetale Anämie ist häufig mit Pleura- und Perikardergüssen, Aszites und/oder Hautödemen assoziiert. Eine hilfreiche Methode zur fetalen Anämiediagnostik stellt die Messung der systolischen Maximalgeschwindigkeit in der A. cerebri media dar, die im Falle einer Anämie > 1,5 MOM liegt.

Intrauterine Infektionen können durch maternale Beschwerden, oder durch fetale Auffälligkeiten, wie z. B. einem Hydrocephalus aufgrund einer Toxoplasmose, vermutet werden.

### Prognose

▼ Das Risiko folgender geburtshilflicher Komplikationen ist bei einem Polyhydramnion aufgrund einer Überdehnung des Uterus erhöht [1, 46, 47]:

- ▶ maternale Atembeschwerden
- ▶ Frühgeburtlichkeit
- ▶ vorzeitiger Blasensprung
- ▶ regelwidrige Kindslagen
- ▶ Nabelschnurvorfall
- ▶ postpartale Blutung
- ▶ fetale Makrosomie aufgrund eines maternalen Diabetes mellitus
- ▶ hypertensive Schwangerschaftserkrankungen
- ▶ Harnwegsinfektionen

Diese Risiken variieren in Abhängigkeit vom Schweregrad und der Ätiologie des Polyhydramnions [1–3]. Bei einem Depot von weniger als 2 cm steigt die perinatale Mortalität um das 13-Fache, bei unter 1 cm um das 47-Fache an [26].

Eine prospektive longitudinale Studie an normalen Einlingschwangerschaften zeigte folgende Komplikationen [34]:

- ▶ erhöhte Sectio-Rate aus fetaler Indikation
- ▶ niedriger 5-Minuten-Apgar-Wert
- ▶ höhere Rate an Aufnahmen auf der Neugeborenenintensivstation

- ▶ höheres Geburtsgewicht
- ▶ erhöhte Sectio-Rate aus fetaler Indikation
- ▶ niedriger 5-Minuten-Apgar-Wert
- ▶ höhere Rate an Aufnahmen auf der Neugeborenenintensivstation
- ▶ höheres Geburtsgewicht

In einer großen Studie an 85000 Schwangerschaften, darunter 3900 Schwangerschaften mit erhöhtem Fruchtwasserindex, wurde festgestellt, dass ein Polyhydramnion selbst ein Risiko für eine erhöhte perinatale Mortalität darstellt [48]. Dabei besitzen SGA-Feten mit Polyhydramnion die schlechteste Prognose [78].

### Behandlungsmöglichkeiten zur Reduktion des Fruchtwasservolumens

Eine Behandlungsoption ist die Reduktion des Fruchtwasservolumens, um das maternale Wohlbefinden zu verbessern und die Schwangerschaft zu verlängern. Es stehen folgende Methoden zur Verfügung:

- ▶ invasive Amnionreduktion [53–55]
- ▶ medikamentöse Amnionreduktion [49–52]

#### Invasive Amnionreduktion

Die Methode wurde zwar bis dato nicht in randomisierten oder kontrollierten Studien untersucht, hat aber bei sorgfältiger Indikationsstellung einen eindeutigen klinischen Benefit. Es besteht jedoch kein Konsens über die Menge des aspirierten Fruchtwassers, die Geschwindigkeit der Aspiration, den Einsatz einer Tokolyse oder Antibiose. Der Eingriff wird normalerweise beendet, wenn sonografisch ein AFI von 15 bis 20 cm besteht oder falls ein intraamniotischer Druck < 20 mmHg erreicht wurde [53, 66]. In manchen Fällen muss der Eingriff wegen maternalem Unwohlsein oder vorzeitiger Plazentalösung beendet werden. Dabei werden tokolytische Medikamente zur Prophylaxe vorzeitiger Wehen routinemäßig eingesetzt.

Komplikationen treten in 1–3% der Fälle auf. Dazu gehören vorzeitige Wehentätigkeit, vorzeitige Plazentalösung, vorzeitiger Blasensprung, Hyperproteinämie und ein Amnioninfektionssyndrom [52, 54]. Nach dem Eingriff empfiehlt sich eine regelmäßige Kontrolle der Fruchtwassermenge, je nach Bedarf in einem Intervall von 1 bis 3 Wochen.

#### Prostaglandinsynthetasehemmer

Prostaglandinsynthetasehemmer stimulieren die fetale Sekretion von Arginin-Vasopressin, wodurch eine vasopressininduzierte Antidiurese verursacht werden kann [49, 57, 58, 62]. Ein reduzierter renaler Blutfluss führt zu einer Reduktion der fetalen Urinproduktion. Oben genannte Substanzen können auch die Produktion von Lungenflüssigkeit hemmen oder die Reabsorption verstärken [56].

Die Anwendung von Prostaglandinsynthetasehemmern ist allerdings für diese Indikation während der Schwangerschaft nicht zugelassen.

Sie können allerdings als Analgetikum oder zur antiphlogistischen Therapie im 1. und 2. Trimenon der Schwangerschaft verwendet werden. Ab der 28. SSW ist von einer Anwendung in der Schwangerschaft abzuraten [88]. Es muss aber erwähnt werden, dass die Benutzung dieser Medikamente im Allgemeinen in der Schwangerschaft nicht zugelassen ist.

#### Sulindac

Sulindac ist eine nicht steroidale antiinflammatorische Substanz und kann ebenfalls zu einer Reduktion des Fruchtwasservolumens führen. Es wurde berichtet, dass dieses Medikament den Ductus arteriosus weniger als Indomethacin einschränken soll [58–61]. Jedoch ist die Benutzung dieser Substanz durch Studien ebenfalls nicht belegt.

### Experimentelle Therapie – ein Ausblick in die Zukunft

Da der fetale Urin die hauptsächliche Quelle des Fruchtwassers ist und die Änderung der Urinproduktion die Dynamik des Fruchtwasservolumens wesentlich ändern kann, wurde der Effekt einer intraamniotischen Applikation von Arginin-Vasopressin untersucht. Das Arginin-Vasopressin wird über das fetale Plasma aus dem Fruchtwasser aufgenommen. Die Effekte eines V2-Rezeptor-Agonisten, dem Deamino-(D-Arg8-)Vasopressin, auf das fetale Plasma-Arginin-Vasopressin, Immunreaktivität, fetale Urinproduktion und auf den Schluckakt wurde an 6 einzelnen Schafsschwangerschaften untersucht. Es konnte gezeigt werden, dass die intraamniotische Applikation von Deamino-(D-Arg8-)Vasopressin eine persistierende fetale Antidiurese, jedoch ohne kardiovaskuläre Veränderungen oder fetale Schluckstörungen, bewirkt. Auch wenn die Datenlage keine allgemeingültige Aussage zulässt, könnte dies somit eine potenzielle Therapie eines Polyhydramnions sein [63].

Ein anderer Therapieansatz beruht auf Kenntnissen über die mRNA-Expression in Chorion- und Amnionzellen von Aquaporin (AQP) 1, 8 und 9 im Fruchtwasser, welches bei Polyhydramnion vermehrt ist. Aquaporine sind Wasserkanalproteine, die den intrazellulären Wasserhaushalt regulieren. Die AQP1-Expression kann als kompensatorischer Faktor eines Polyhydramnions angesehen werden. Eine Reduzierung dieses Proteins in Bezug auf die Behandlung des Polyhydramnions muss noch evaluiert werden [64, 65]. Die Wirkung und Sicherheit dieser experimentellen Therapieansätze sollte noch in prospektiv randomisierten Studien evaluiert werden.

### Überwachung einer Schwangerschaft mit einem Polyhydramnion

In Anbetracht der erhöhten perinatalen Mortalität und Morbidität bei Schwangerschaften mit Polyhydramnion wird ein intensives Monitoring empfohlen [46].

#### Abwartendes Vorgehen vs. Intervention

Es gibt keine prospektiv randomisierte Studie, die ein abwartendes Verhalten mit einem aktiven Vorgehen bei idiopathischem Polyhydramnion verglichen hat [1]. Allgemein empfohlen wird eine Intervention bei ausgeprägten Fällen mit maternalen Beschwerden oder bei geburtshilflichen Komplikationen, z.B. bei drohender Frühgeburt.

#### Geburt

Unter der Geburt sollte die fetale Kopfposition mehrmals überprüft werden, da eine Positionsänderung in Beckenend- oder Querlage intrapartal möglich ist.

Der spontane Blasensprung kann zu einer ausgeprägten uterinen Dekompression führen mit dem Risiko eines Nabelschnurvorfalles

oder einer Plazentalösung. Ein induzierter Blasensprung sollte daher kontrolliert vorgenommen werden.

Obwohl ein Polyhydramnion keine Kontraindikation zur Applikation von Oxytocin oder Prostaglandinen ist, sollten diese trotzdem vorsichtig angewandt werden. Postpartal besteht ein erhöhtes Risiko für atonische Nachblutungen und Fruchtwasserembolien [57,67].

### Fazit für die Praxis

Ein sonografisch diagnostiziertes Polyhydramnion erfordert eine weiterführende maternale und fetale Diagnostik. Bei der Mutter sollte ein Gestationsdiabetes ausgeschlossen und TORCH-Diagnostik durchgeführt werden. Beim Fetus sollte eine strukturierte morphologische Diagnostik geplant werden. Bezüglich der Geburt ist eine Entbindung in einem Perinatalzentrum anzuraten.

### Interessenkonflikt

Nein.

### Literatur

- Golan A, Wolman I, Sagi J et al. Persistence of polyhydramnios during pregnancy – its significance and correlation with maternal and fetal complications. *Gynecol Obstet Invest* 1994; 37: 18
- Many A, Hill LM, Lazebnik N et al. The association between polyhydramnios and preterm delivery. *Obstet Gynecol* 1995; 86: 389
- Smith CV, Plambeck RD, Rayburn WF et al. Relation of mild idiopathic polyhydramnios to perinatal outcome. *Obstet Gynecol* 1992; 79: 387
- Alexander ES, Spitz HB, Clark RA. Sonography of polyhydramnios. *AJR Am J Roentgenol* 1982; 138: 343
- Hill LM, Breckle R, Thomas ML et al. Polyhydramnios: ultrasonically detected prevalence and neonatal outcome. *Obstet Gynecol* 1987; 69: 21
- Hobbins JC, Grannum PA, Berkowitz RL et al. Ultrasound in the diagnosis of congenital anomalies. *Am J Obstet Gynecol* 1979; 134: 331
- Dashe JS, McIntire DD, Ramus RM et al. Hydramnios: anomaly prevalence and sonographic detection. *Obstet Gynecol* 2002; 100: 134
- Brace RA. Physiology of amniotic fluid volume regulation. *Clin Obstet Gynecol* 1997; 40: 280
- Harding R, Bocking AD, Sigger JN et al. Composition and volume of fluid swallowed by fetal sheep. *Q J Exp Physiol* 1984; 69: 487
- Pritchard JA. Deglutition by normal and anencephalic fetuses. *Obstet Gynecol* 1965; 25: 289
- Pritchard JA. Fetal swallowing and amniotic fluid volume. *Obstet Gynecol* 1966; 28: 606
- Phelan JP, Martin GI. Polyhydramnios: fetal and neonatal implications. *Clin Perinatol* 1989; 16: 987
- Ledger WF. Maternal Infection with adverse fetal and newborn Outcomes. In: *Infection in the Female*. Philadelphia: Lea & Febiger; 1986: 197
- Queenan JT, Gadow EC. Polyhydramnios: chronic versus acute. *Am J Obstet Gynecol* 1970; 108: 349
- Murray SR. Hydramnios: a study of 846 cases. *Am J Obstet Gynecol* 1964; 88: 65
- Ben-Chetrit A, Hochner-Celnikier D, Ron M et al. Hydramnios in the third trimester of pregnancy: a change in the distribution of accompanying fetal anomalies as a result of early ultrasonographic prenatal diagnosis. *Am J Obstet Gynecol* 1990; 162: 1344
- Stoll CG, Alembik Y, Dott B. Study of 156 cases of polyhydramnios and congenital malformations in a series of 118,265 consecutive births. *Am J Obstet Gynecol* 1991; 165: 586
- Shani H, Sivan E, Cassif E et al. Maternal hypercalcemia as a possible cause of unexplained fetal polyhydramnion: a case series. *Am J Obstet Gynecol* 2008; 199: 410.e1
- Dorleijn DM, Cohen-Overbeek TE, Groenendaal F et al. Idiopathic polyhydramnios and postnatal findings. *J Matern Fetal Neonatal Med* 2009; 22: 315
- Sieck UV, Ohlsson A. Fetal polyuria and hydramnios associated with Bartter's syndrome. *Obstet Gynecol* 1984; 63: 225
- Lee SM, Jun JK, Lee EJ et al. Measurement of fetal urine production to differentiate causes of increased amniotic fluid volume. *Ultrasound Obstet Gynecol* 2010; 36: 191
- Vink JY, Poggi SH, Ghidini A et al. Amniotic fluid index and birth weight: is there a relationship in diabetics with poor glycemic control? *Am J Obstet Gynecol* 2006; 195: 848
- Idris N, Wong SF, Thomae M et al. Influence of polyhydramnios on perinatal outcome in pregestational diabetic pregnancies. *Ultrasound Obstet Gynecol* 2010; 36: 338
- Touboul C, Boileau P, Picone O et al. Outcome of children born out of pregnancies complicated by unexplained polyhydramnios. *BJOG* 2007; 114: 489
- Touboul C, Picone O, Levallant JM et al. Clinical application of fetal urine production rate in unexplained polyhydramnios. *Ultrasound Obstet Gynecol* 2009; 34: 521
- Halperin ME, Fong KW, Zalev AH et al. Reliability of amniotic fluid volume estimation from ultrasonograms: intraobserver and interobserver variation before and after the establishment of criteria. *Am J Obstet Gynecol* 1985; 153: 264–267
- Magann EF, Perry KG, Chauhan SP et al. The accuracy of ultrasound evaluation of amniotic fluid volume in singleton pregnancies: the effect of operator experience and ultrasound interpretative technique. *J Clin Ultrasound* 1997; 25: 249–253
- Magann EF, Isler CM, Chauhan SP et al. Amniotic fluid volume estimation and the biophysical profile: a confusion criteria. *Obstet Gynecol* 2000; 96: 640–642
- Chamberlain PF, Manning FA, Morrison I et al. Ultrasound evaluation of amniotic volume. I. The relationship of marginal and decreased amniotic fluid volume to perinatal outcome. *Am J Obstet Gynecol* 1984; 150: 245–249
- Manning FA, Harmon CR, Morrison I. Fetal assessment based on fetal biophysical profile scoring. IV. An analysis of perinatal morbidity and mortality. *Am J Obstet Gynecol* 1990; 162: 703–709
- Phelan JP, Ahn MO, Smith CV et al. Amniotic fluid index measurements during pregnancy. *J Reprod Med* 1987; 32: 601–604
- Moore TR, Cayle JE. The amniotic fluid index in normal human pregnancy. *Am J Obstet Gynecol* 1990; 162: 1168–1173
- Magann EF, Whithworth NS, Klausen JH et al. Accuracy of ultrasonography in evaluating amniotic fluid index at less than 24 weeks' gestation. *J Ultrasound Med* 1995; 14: 895–897
- Zlatnik MG, Olson G, Bukowski R et al. Amniotic fluid index measured with the aid of color flow Doppler. *J Matern Fetal Med* 2003; 13: 242–245
- Flack NJ, Doré C, Southwell D et al. The influence of operator transducer pressure on ultrasonographic measurements of amniotic fluid volume. *Am J Obstet Gynecol* 1994; 171: 218–222
- Magann EF, Nolan TE, Hess LW et al. Measurements of amniotic fluid volume: accuracy of ultrasonography techniques. *Am J Obstet Gynecol* 1992; 167: 1533–1537
- Gramellini D, Delle Chiaie L, Piantelli G et al. Sonographic assessment of amniotic fluid volume between 11 and 24 weeks of gestation: construction of reference intervals related to gestational age. *Ultrasound Obstet Gynecol* 2001; 17: 410–415
- Magann EF, Chauhan SP, Barilleaux PS et al. Amniotic fluid index and single deepest pocket: weak indicators of abnormal amniotic volumes. *Obstet Gynecol* 2000; 96: 737–740
- Magann EF, Chauhan SP, Barrilleaux PS et al. Amniotic fluid index and single deepest pocket: weak indicators of abnormal amniotic volumes. *Obstet Gynecol* 2000; 96: 737
- Barnhard Y, Bar-Hava I, Divon MY. Is polyhydramnios in an ultrasonographically normal fetus an indication for genetic evaluation? *Am J Obstet Gynecol* 1995; 173: 1523
- Chauhan SP, Magann EF, Morrison JC et al. Ultrasonographic assessment of amniotic fluid does not reflect actual amniotic fluid volume. *Am J Obstet Gynecol* 1997; 177: 291
- Landy HJ, Isada NB, Larsen jr. JW. Genetic implications of idiopathic hydramnios. *Am J Obstet Gynecol* 1987; 157: 114
- Brady K, Polzin WJ, Kopelman JN et al. Risk of chromosomal abnormalities in patients with idiopathic polyhydramnios. *Obstet Gynecol* 1992; 79: 234
- Carlson DE, Platt LD, Medearis AL et al. Quantifiable polyhydramnios: diagnosis and management. *Obstet Gynecol* 1990; 75: 989
- Zahn CM, Hankins GD, Yeomans ER. Karyotypic abnormalities and hydramnios. Role of amniocentesis. *J Reprod Med* 1993; 38: 599

- 46 Magann EF, Chauhan SP, Doherty DA et al. A review of idiopathic hydramnios and pregnancy outcomes. *Obstet Gynecol Surv* 2007; 62: 795
- 47 Magann EF, Doherty DA, Lutgendorf MA et al. Peripartum outcomes of high-risk pregnancies complicated by oligo- and polyhydramnios: a prospective longitudinal study. *J Obstet Gynaecol Res* 2010; 36: 268
- 48 Erez O, Shoham-Vardi I, Sheiner E et al. Hydramnios and small for gestational age are independent risk factors for neonatal mortality and maternal morbidity. *Arch Gynecol Obstet* 2005; 271: 296
- 49 Cabrol D, Landesman R, Muller J et al. Treatment of polyhydramnios with prostaglandin synthetase inhibitor (indomethacin). *Am J Obstet Gynecol* 1987; 157: 422
- 50 Hickok DE, Hollenbach KA, Reilley SF et al. The association between decreased amniotic fluid volume and treatment with nonsteroidal anti-inflammatory agents for preterm labor. *Am J Obstet Gynecol* 1989; 160: 1525
- 51 Kirshon B, Mari G, Moise jr. KJ. Indomethacin therapy in the treatment of symptomatic polyhydramnios. *Obstet Gynecol* 1990; 75: 202
- 52 Elliott JP, Sawyer AT, Radin TG et al. Large-volume therapeutic amniocentesis in the treatment of hydramnios. *Obstet Gynecol* 1994; 84: 1025
- 53 Fisk NM, Tannirandorn Y, Nicolini U et al. Amniotic pressure in disorders of amniotic fluid volume. *Obstet Gynecol* 1990; 76: 210
- 54 Leung WC, Jouannic JM, Hyett J et al. Procedure-related complications of rapid amniodrainage in the treatment of polyhydramnios. *Ultrasound Obstet Gynecol* 2004; 23: 154
- 55 Jauniaux E, Holmes A, Hyett J et al. Rapid and radical amniodrainage in the treatment of severe twin-twin transfusion syndrome. *Prenat Diagn* 2001; 21: 471
- 56 Kramer WB, Van den Veyver IB, Kirshon B. Treatment of polyhydramnios with indomethacin. *Clin Perinatol* 1994; 21: 615
- 57 Harman CR. Amniotic fluid abnormalities. *Semin Perinatol* 2008; 32: 288
- 58 Moise jr. KJ. Polyhydramnios. *Clin Obstet Gynecol* 1997; 40: 266
- 59 Bartfield M, Carlan SJ. The safety and efficacy of prolonged outpatient sulindac to prevent the recurrence of preterm labor: a prospective double-blind study. *Prim Care Update Ob Gyns* 1998; 5: 178
- 60 Kramer WB, Saade GR, Belfort M et al. A randomized double-blind study comparing the fetal effects of sulindac to terbutaline during the management of preterm labor. *Am J Obstet Gynecol* 1999; 180: 396
- 61 Peek MJ, McCarthy A, Kyle P et al. Medical amnioreduction with sulindac to reduce cord complications in monoamniotic twins. *Am J Obstet Gynecol* 1997; 176: 334
- 62 Gilbert WM, Cheung CY, Brace RA. Rapid intramembranous absorption into the fetal circulation of arginine vasopressin injected intraamniotically. *Am J Obstet Gynecol* 1991; 164: 1013
- 63 Kullama LK, Nijland MJ, Ervin MG et al. Intraamniotic deamino(D-Arg8)-vasopressin: prolonged effects on ovine fetal urine flow and swallowing. *Am J Obstet Gynecol* 1996; 174: 78
- 64 Mann SE, Dvorak N, Gilbert H et al. Steady-state levels of aquaporin 1 mRNA expression are increased in idiopathic polyhydramnios. *Am J Obstet Gynecol* 2006; 194: 884
- 65 Zhu X, Jiang S, Hu Y et al. The expression of aquaporin 8 and aquaporin 9 in fetal membranes and placenta in term pregnancies complicated by idiopathic polyhydramnios. *Early Hum Dev* 2010; 86: 657
- 66 Rode L, Bundgaard A, Skibsted L et al. Acute recurrent polyhydramnios: a combination of amniocentesis and NSAID may be curative rather than palliative. *Fetal Diagn Ther* 2007; 22: 186
- 67 Kramer MS, Rouleau J, Baskett TF et al. Amniotic-fluid embolism and medical induction of labour: a retrospective, population-based cohort study. *Lancet* 2006; 368: 1444
- 68 Kleinwechter H, Bührer C, Hunger-Battefeld W et al. AWMF-S3-Leitlinie: Diabetes und Schwangerschaft. Online: <http://www.awmf.org/leitlinien/detail/II/057-023.html>; Stand: 06.11.2013
- 69 Richtlinien des Gemeinsamen Bundesausschusses über die ärztliche Betreuung während der Schwangerschaft und nach der Entbindung („Mutterschafts-Richtlinien“) in der Fassung 10. Dezember 1985. Veröffentlichung im Bundesanzeiger Nr. 60 a vom 27. März 1986, zuletzt geändert am 18. Juli 2013, in Kraft getreten am 20. September 2013
- 70 Horrow MM. Enlarged amniotic cavity: a new sonographic sign of early embryonic death. *AJR Am J Roentgenol* 1992; 158: 359–362
- 71 Yegul NT, Filly RA. The expanded amnion sign: evidence of early embryonic death. *J Ultrasound Med* 2009; 28: 1331–1335
- 72 Erez O, Shoham-Vardo I, Sheiner E et al. Hydramnios and small for gestational age are independent risk factors for neonatal mortality and maternal morbidity. *Arch Gynecol Obstet* 2004; 271: 296
- 73 Sickler GK, Nyberg DA, Sohaey R et al. Polyhydramnios and fetal intrauterine growth restriction: ominous combination. *J Ultrasound Med* 1997; 16: 609–614
- 74 Morin L, Lim K. Ultrasound in twin pregnancies. *J Obstet Gynaecol Can* 2011; 33: 643–656
- 75 National Collaborating Centre for Women's and Children's Health (UK). Multiple pregnancy: the management of twin and triplet pregnancies in the antenatal period. London: RCOG Press; 2011. National Institute for Health and Clinical Excellence: Guidance
- 76 Gezer A, Rashidova M, Güralp O et al. Perinatal mortality and morbidity in twin pregnancies: the relation between chorionicity and gestational age at birth. *Arch Gynecol Obstet* 2012; 285: 353–360
- 77 Hack KE, Derks JB, Elias SG et al. Perinatal mortality and mode of delivery in monochorionic diamniotic twin pregnancies  $\geq$  32 weeks of gestation: a multicentre retrospective cohort study. *BJOG* 2011; 118: 1090–1097
- 78 Nyberg DA, Kramer D, Resta RG et al. Prenatal sonographic findings of trisomy 18: review of 47 cases. *J Ultrasound Med* 1993; 12: 103–113
- 79 Papp C, Szigeti Z, Tóth-Pál E et al. Ultrasonographic findings of fetal aneuploidies in the second trimester – our experiences. *Fetal Diagn Ther* 2008; 23: 105
- 80 Fayyaz H, Rafi J. TORCH screening in polyhydramnios: an observational study. *J Matern Fetal Neonatal Med* 2012; 25: 1069
- 81 Abdel-Fattah SA, Bhat A, Illanes S et al. TORCH test for fetal medicine indications: only CMV is necessary in the United Kingdom. *Prenat Diagn* 2005; 25: 1028–1031
- 82 Mladina N, Mehikić G, Pasić A. [TORCH infections in mothers as a cause of neonatal morbidity]. *Med Arh* 2000; 54: 273–276
- 83 Salomon LJ, Sonigo P, Ou P et al. Real-time fetal magnetic resonance imaging for the dynamic visualization of the pouch in esophageal atresia. *Ultrasound Obstet Gynecol* 2009; 34: 471–474
- 84 Langer JC, Hussain H, Khan A et al. Prenatal diagnosis of esophageal atresia using sonography and magnetic resonance imaging. *J Pediatr Surg* 2001; 36: 804–807
- 85 Chaumoitre K, Amous Z, Bretelle F et al. Prenatal MRI diagnosis of esophageal atresia. *J Radiol* 2004; 85 (12 Pt 1): 2029–2031
- 86 Chen M, Chen CP. Invasive fetal therapy, global status and local development. *Taiwanese J Obstet Gynecol* 2004; 439: 185–192
- 87 Magann EF, Chauhan SP, Doherty DA et al. A review of idiopathic hydramnios and pregnancy outcomes. *Obstet Gynecol Surv* 2007; 62: 795–802
- 88 Embryotoxikologisches Institut. Diclofenac in der Schwangerschaft. Online: <https://www.embryotox.de/diclofenac.html>; Stand: 20.11.2013
- 89 Nabhan AF, Abdelmoula YA. Amniotic fluid index versus single deepest vertical pocket as a screening test for preventing adverse pregnancy outcome. *Cochrane Database Syst Rev* 2008; 3: CD006593
- 90 Chauhan SP, Doherty DD, Magann EF et al. Amniotic fluid index vs. single deepest pocket technique during modified biophysical profile: a randomized clinical trial. *Am J Obstet Gynecol* 2004; 191: 661
- 91 Magann EF, Doherty DA, Ennen CS et al. The ultrasound estimation of amniotic fluid volume in diamniotic twin pregnancies and prediction of peripartum outcomes. *Am J Obstet Gynecol* 2007; 196: 570.e1
- 92 Gerson A, Free jr. SM, Russino J et al. Amniotic fluid index in twin gestation. *Ultrasound Obstet Gynecol* 1997; 10: 98
- 93 Hill LM, Krohn M, Lazebnik N et al. The amniotic fluid index in normal twin pregnancies. *Am J Obstet Gynecol* 2000; 182: 950
- 94 Magann EF, Chauhan SP, Martin jr. JN et al. Ultrasonic assessment of the amniotic fluid volume in diamniotic twins. *J Soc Gynecol Investig* 1995; 2: 609
- 95 Magann EF, Chauhan SP, Whitworth NS et al. Determination of amniotic fluid volume in twin pregnancies: ultrasonographic evaluation versus operator estimation. *Am J Obstet Gynecol* 2000; 182: 1606
- 96 Watson WJ, Harlass FE, Menard MK et al. Sonographic assessment of amniotic fluid in normal twin pregnancy. *Am J Perinatol* 1995; 12: 122
- 97 Chau AC, Kjos SL, Kovacs BW. Ultrasonographic measurement of amniotic fluid volume in normal diamniotic twin pregnancies. *Am J Obstet Gynecol* 1996; 174: 1003
- 98 Porter TF, Dildy GA, Blanchard JR et al. Normal values for amniotic fluid index during uncomplicated twin pregnancy. *Obstet Gynecol* 1996; 87: 699
- 99 Dashe JS, McIntire DD, Ramus RM et al. Hydramnios: anomaly prevalence and sonographic detection. *Obstet Gynecol* 2002; 100: 134–139
- 100 Oyebede F, Rastogi A, Berrisford G et al. Psychotropics in pregnancy: safety and other considerations. *Pharmacol Ther* 2012; 135: 71–77
